# Supplementary material for: On the relation between apparent ion and total particle growth rates in the boreal forest and related chamber experiments
Source: Copernicus journal article supplement (doi:10.5194/acp-2022-234), 2022-03-30
Supplement: Supplementary file 1 [file acp-2022-234-supplement.pdf]

1 *Supplement of*

2 **On the relation between apparent ion and total particle growth**  
3 **rates in the boreal forest and related chamber experiments**

4 **Loïc Gonzalez Carracedo et al.**

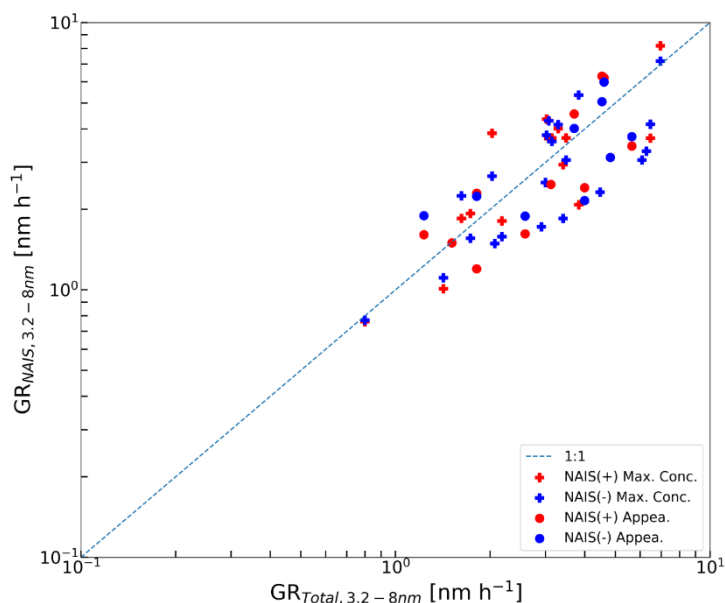

5

6 **Figure S1: Comparison of 3.2-8 nm ion (measured with NAIS) and total (measured with DMA-Train) particle growth rate**  
7 **obtained from both methods (maximum concentration method crosses and appearance time method circles) with the blue**  
8 **dashed line again indicating the 1:1 ratio. Red symbols correspond to a measurement of the positive ion growth rate and blue**  
9 **symbols correspond to the measurement of the negative ion growth rates.**

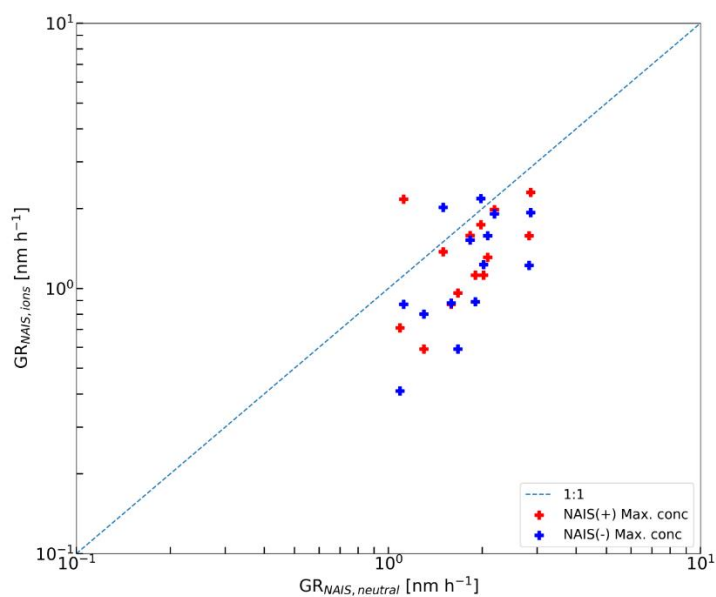

10

11 **Figure S2: Comparison of sub 3-nm ion (measured with NAIS) and total (measured with NAIS) particle growth rate**  
12 **obtained from maximum concentration with the blue dashed line again indicating the 1:1 ratio. Red symbols correspond to a**  
13 **measurement of the positive ion growth rate and blue symbols correspond to the measurement of the negative ion growth rates.**

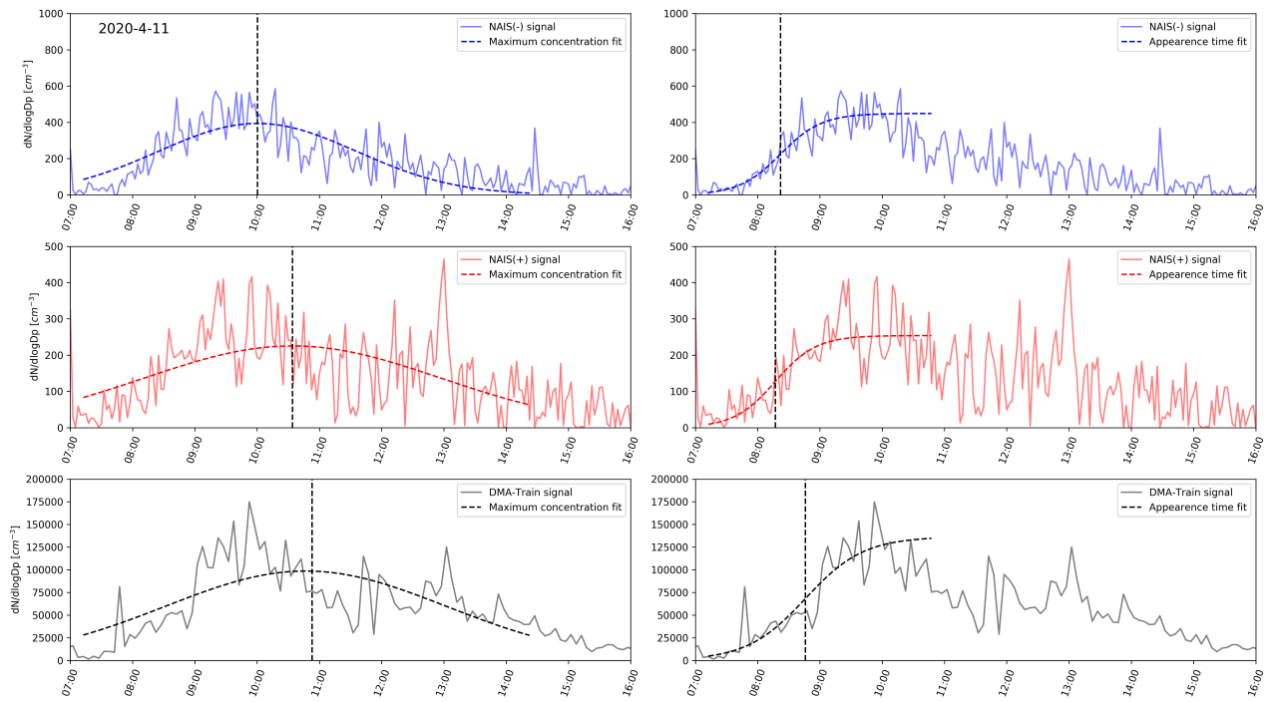

14

15 **Figure S3: Illustration of the earlier maximum concentration and appearance times for the ion populations (upper two panels,**  
 16 **blue negative ions and red positive ions, measured by NAIS) compared to the total (neutral plus charged, measured by DMA-**  
 17 **train). Measured data for the 11<sup>th</sup> of April 2020 as solid lines, dashed lines in left panels show the maximum concentration fit**  
 18 **(Gaussian shape, see Hirsikko et al., 2005) and the dashed lines on the right panels show the appearance time fit (Sigmoidal**  
 19 **shape, see Stolzenburg et al., 2018). The vertical dashed lines indicate the point of the maximum concentration or 50%**  
 20 **appearance time point as a result of the fit.**
